# Supplementary material for: Immunomodulation of T Helper Cells by Tumor Microenvironment in Oral Cancer Is Associated With CCR8 Expression and Rapid Membrane Vitamin D Signaling Pathway
Source: Front Immunol. 2021 May 7;12:643298. doi: 10.3389/fimmu.2021.643298 (PMC8137990; doi:10.3389/fimmu.2021.643298)
Supplement: Supplementary file 1 [file Presentation_1.pdf]

## *Supplementary Material*

### Immunomodulation of T helper cells by tumor microenvironment in oral cancer is associated with CCR8 expression and rapid membrane Vitamin D signaling pathway

Marco Fraga<sup>1</sup>, Milly Yáñez<sup>2</sup>, Macarena Sherman<sup>3,4,5</sup>, Faryd Llerena<sup>1</sup>, Mauricio Hernandez<sup>6</sup>, Guillermo Nourdin<sup>6</sup>, Francisco Álvarez<sup>6</sup>, Joaquín Urrizola<sup>7</sup>, César Rivera<sup>8</sup>, Liliana Lamperti<sup>1,9</sup>, Lorena Nova<sup>10</sup>, Silvia Castro<sup>1</sup>, Omar Zambrano<sup>11</sup>, Alejandro Cifuentes<sup>11</sup>, León Campos<sup>12</sup>, Sergio Moya<sup>12</sup>, Juan Pastor<sup>12</sup>, Marcelo Nuñez<sup>12</sup>, Jorge Gatica<sup>12</sup>, Jorge Figueroa<sup>12</sup>, Felipe Zúñiga<sup>1</sup>, Carlos Salomón<sup>13</sup>, Gustavo Cerda<sup>14</sup>, Ricardo Puentes<sup>5</sup>, Gonzalo Labarca<sup>1</sup>, Mabel Vidal<sup>15</sup>, Reuben McGregor<sup>16</sup> and Estefania Nova-Lamperti<sup>1\*</sup>

#### **\* Correspondence:**

Corresponding Author

[enovalamperti@gmail.com](mailto:enovalamperti@gmail.com), [enova@udec.cl](mailto:enova@udec.cl)

#### **Project Accession**

The mass spectrometry proteomics data have been deposited to the ProteomeXchange Consortium via the PRIDE partner repository with the dataset identifier PXD023049. The accession number for the RNA-seq is GSE171638.

## 1.1 Supplementary Figures

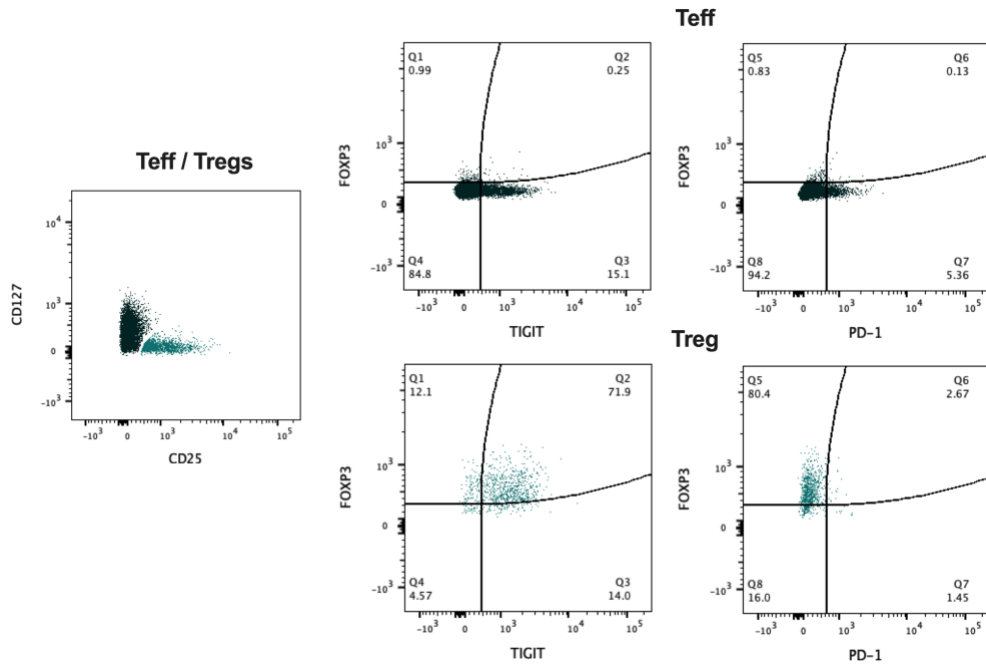

**Supplementary Figure 1. FOXP3 expression on CD127<sup>low</sup>CD25<sup>hi</sup> Tregs.** CD4<sup>+</sup>T cells were divided into Teff and Tregs based on CD127 and CD25 expression. FOXP3 expression was confirmed on CD127<sup>low</sup>CD25<sup>hi</sup> Tregs and Teff.

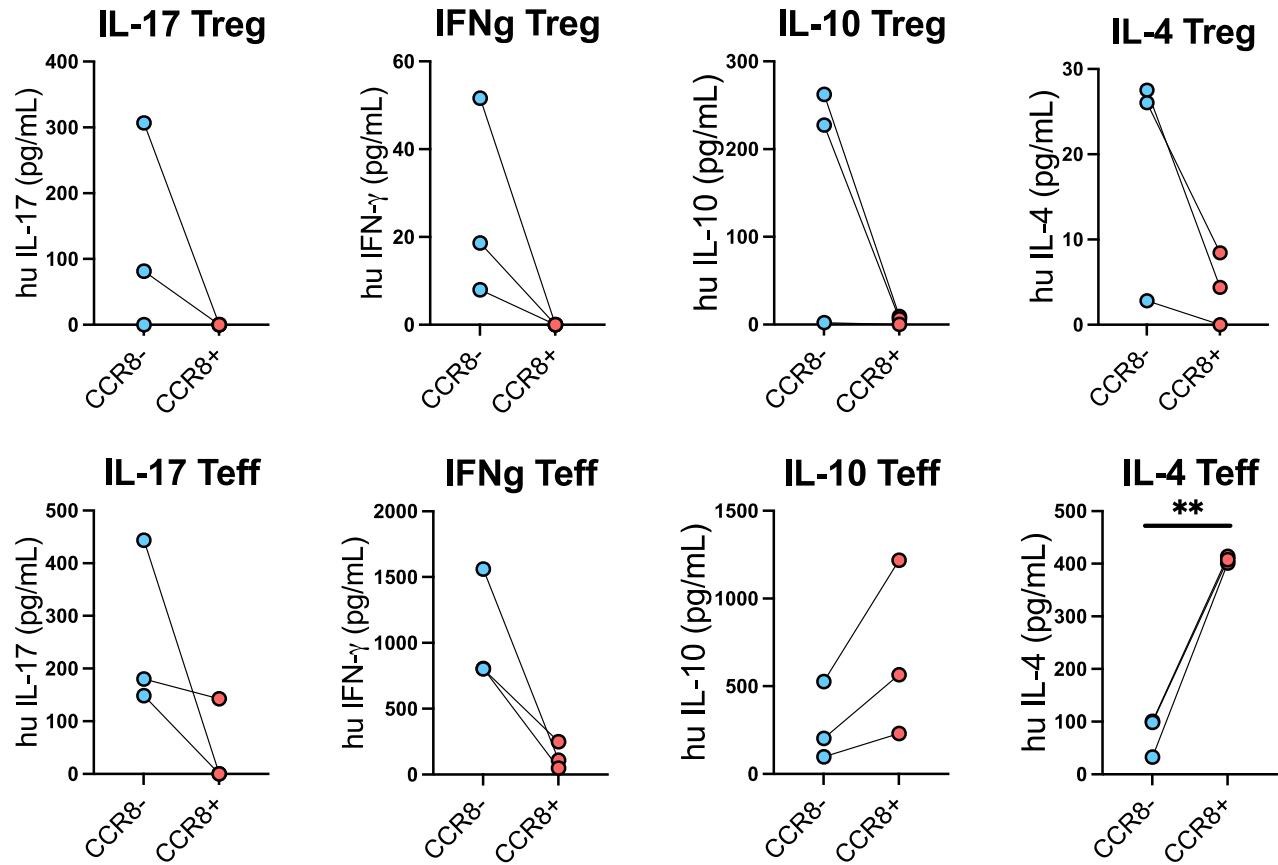

**Supplementary Figure 2. Analysis of cytokine production by CCR8<sup>+</sup> and CCR8<sup>-</sup> Treg and Teff.** Sorted CD4<sup>+</sup> T cells were sorted as Treg CCR8<sup>+</sup>, Treg CCR8<sup>-</sup>, Teff CCR8<sup>+</sup> and Teff CCR8<sup>-</sup>. 1x10<sup>5</sup> cells were activated with anti-CD3CD28 beads (1:5) and cytokines in the supernatant were analyzed with Th1/2/17 cytokine bead array kit. Data are presented using individual symbols with paired lines (Paired t test).

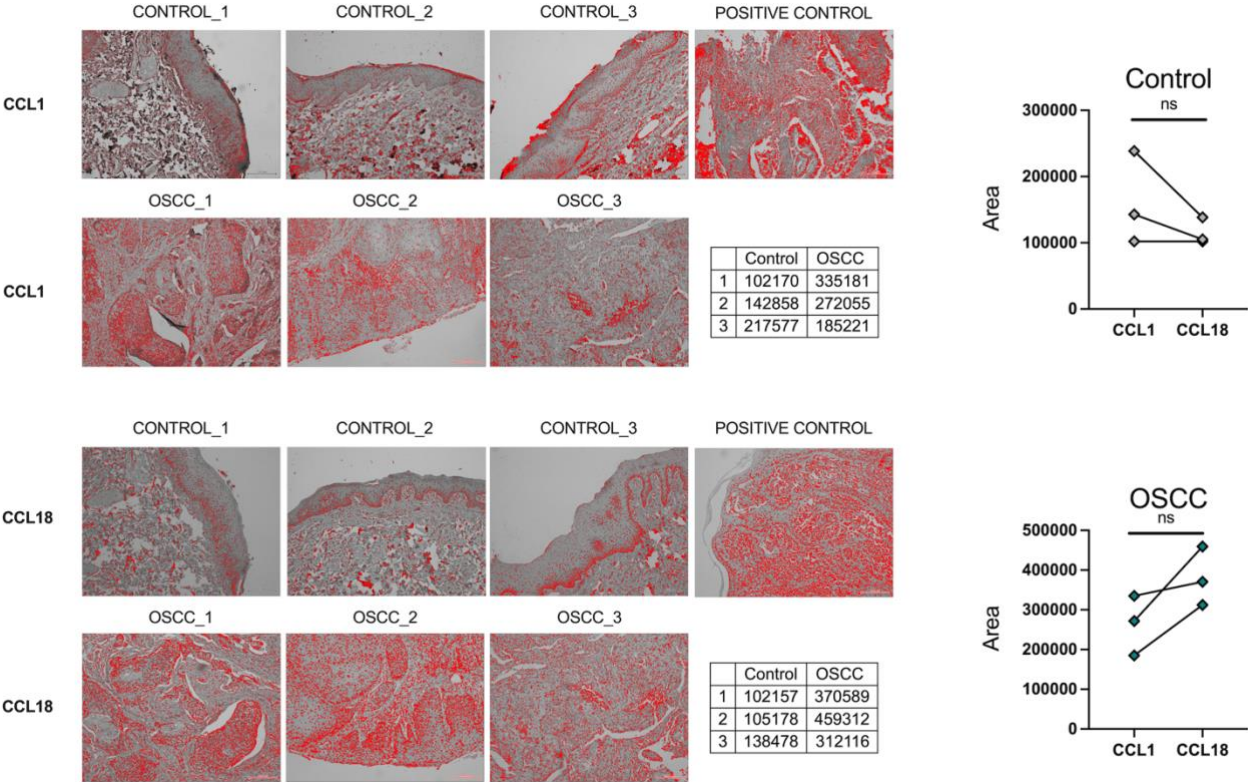

**Supplementary Figure 3.** Immunohistochemical analysis (in red) of CCL1 and CCL18 in biopsies from 3 OSCC and 3 control samples, using colon carcinoma as a positive control for CCL1 and melanoma as a positive control for CCL18.

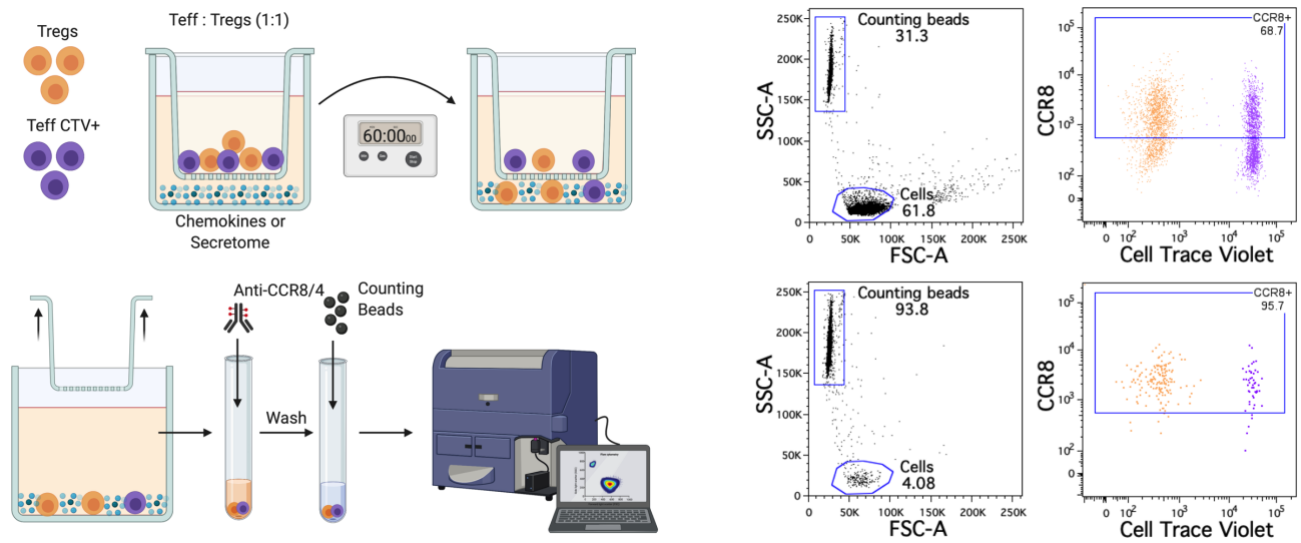

**Supplementary Figure 4. Representative dot plot example of migratory assays.** Sorted cell trace violet<sup>+</sup> Memory Teffs ( $5 \times 10^4$ ) and memory Tregs ( $5 \times 10^4$ ) were placed in the top chamber of a 5- $\mu$ m-pore Transwell filter system. Bottom chambers were filled with control or cancer secretome and media only or CCL18, CCL17, CCL22, CXCL10 (all 0.5  $\mu$ g/mL). Teff and Tregs were quantified after 1h by flow cytometry. Data was acquired on FortessaX20 and analyzed with FlowJo.

## 2 Supplementary Materials

| Reagents                                                                    | Catalogue          | Company           |
|-----------------------------------------------------------------------------|--------------------|-------------------|
| Donkey Anti-Rabbit IgG H&L (HRP)                                            | ab97064            | Abcam             |
| Lymphoprep                                                                  | 04-03-9391/02      | Axis Shields      |
| BD Cytometric Bead Array (CBA) Human Th1/Th2/Th17 Cytokine Kit              | 560484             | BD Biosciences    |
| CCL1/TCA3 antibody                                                          | orb13280           | Biorbyt           |
| MIP4/CCL18 antibody                                                         | orb13576           | Biorbyt           |
| Recombinant Human CCL1 (I-309) (carrier-free)                               | 582702             | BioLegend         |
| Alexa Fluor 488 anti-human CD279 (PD-1) Antibody                            | 367407             | BioLegend         |
| Alexa Fluor 647 anti-human TIGIT (VSTM3) Antibody                           | 372723             | BioLegend         |
| PE anti-human CD198 (CCR8) Antibody                                         | 360604             | BioLegend         |
| Brilliant Violet 421 anti-human CD4 Antibody                                | 317434             | BioLegend         |
| Brilliant Violet 650 anti-human CD196 (CCR6) Antibody                       | 353426             | BioLegend         |
| APC/Cyanine7 anti-human CD45RA Antibody                                     | 304128             | BioLegend         |
| PE/Cyanine7 anti-human CD25 Antibody                                        | 356108             | BioLegend         |
| FITC anti-human CD183 (CXCR3) Antibody                                      | 353704             | BioLegend         |
| APC anti-human CD194 (CCR4) Antibody                                        | 359408             | BioLegend         |
| PerCP/Cyanine5.5 anti-human CD4 Antibody                                    | 317428             | BioLegend         |
| APC anti-human CD127 (IL-7R $\alpha$ ) Antibody                             | 351315             | BioLegend         |
| Pacific Blue anti-human FoxP3 Antibody                                      | 320216             | BioLegend         |
| Alexa Fluor® 647 anti-GATA3                                                 | 653809             | BioLegend         |
| HTS Transwell 96-well Permeable Support                                     | 3388               | Corning           |
| CD127 Monoclonal Antibody (eBioRDR5) PerCP-Cyanine5.5                       | 45-1278-42         | eBiosciences      |
| FoxP3/Transcription Factor Staining Buffer                                  | 00-5523-00         | eBiosciences      |
| Anti-Human/Mouse ROR gamma (t) APC                                          | 17-6988-80         | eBiosciences      |
| eFluor 450 anti-human FoxP3 Antibody                                        | 48-4777-42         | eBiosciences      |
| T-bet Monoclonal Antibody (eBio4B10 (4B10)), PerCP-Cy5.5                    | 45-5825-82         | eBiosciences      |
| PGE2 high sensitivity ELISA kit                                             | ADI-930-001        | Enzo              |
| 1 $\alpha$ ,25-Dihydroxyvitamin D3                                          | BML-DM200-1000     | Enzo              |
| 96 Well U-Bottom                                                            | 353077             | Falcon            |
| Collagenase Type 1                                                          | 17100-017          | Gibco             |
| PBS Tablets                                                                 | 18912-014          | Gibco             |
| Dynabeads Human T-Activator CD3/CD28 for T Cell Expansion and Activation    | 11131D             | Gibco             |
| Pen Strep Glutamine (100X)                                                  | 10378-016          | Gibco             |
| NextSeq 500/550 Mild Output Kit v2.5                                        | 20024904           | Illumina          |
| CountBright Absolute Counting Beads                                         | C36950             | Invitrogen        |
| Tissue Culture Plate 48 well                                                | TCP 011048         | Jet BIOFIL        |
| LIVE/DEAD® Fixable Near-IR Dead Cell Stain Kit                              | L10119             | Life Technologies |
| CellTrace™ Violet Cell Proliferation Kit                                    | C34557             | Life Technologies |
| CountBright™ Absolute Counting Beads                                        | C36950             | Life Technologies |
| X-VIVO 15 Chemically Defined, Serum-free Medium                             | 04-744Q            | Lonza             |
| Memory CD4+ T Cell Isolation Kit, human                                     | 130-091-893        | Miltenyi Biotec   |
| Proleukin recombinant IL-2                                                  | PL-00101/0936      | Novartis          |
| Recombinant Human CCL18/PARC Protein                                        | NBP2-35041         | Novus Biologicals |
| The Human Inflammation & Immunity Transcriptome RNA targeted panel 12-Index | RHS-005Z<br>333114 | QIAGEN            |
| CORNING HTS TRANSWELL-96W                                                   | CLS3388-2EA        | Sigma-Aldrich     |
| DNase I                                                                     | LS002140           | Worthington       |
